# Supplementary material
Source: PubMed Central journal article supplement (PMC4790759)
Supplement: matj009041.ww_default.pdf [file matj009041.ww_default.pdf]

## **Cancer risk in 680 000 people exposed to computed tomography scans in childhood or adolescence: data linkage study of 11 million Australians**

John D Mathews et al *BMJ* 2013;346:f2360

### **Web appendix**

**Web table A. Number of cancers in exposed persons, incidence rate ratios (IRR) exposed versus unexposed, number of excess cancers in exposed persons, and absolute excess incidence rates (EIR) per 100,000 person-years among exposed persons by type of cancer, based on a 5 year lag period.**

**Web table B. Number of cancers in exposed persons, incidence rate ratios (IRR) exposed versus unexposed, number of excess cancers in exposed persons, and absolute excess incidence rate (EIR) per 100,000 person-years among exposed persons by type of cancer, based on a 10 year lag period.**

**Web table C. Number of cancers in exposed persons, and incidence rate ratios (IRR) exposed versus unexposed, for selected cancers by year of first CT scan and years since first exposure, based on a 1 year lag period.**

**Web table D. Number of cancers in exposed persons, incidence rate ratios (IRR) exposed versus unexposed, number of excess cancers in exposed persons, and absolute excess incidence rates (EIR) per 100,000 person-years by type of cancer and sex, based on a 1 year lag period.**

**Web table E. Number of cancers in exposed persons, incidence rate ratios (IRR) exposed versus unexposed, number of excess cancers in exposed persons, and excess incidence rates (EIR) per 100,000 person-years by type of cancer and socioeconomic status (SES), based on a 1 year lag period.**

**Web figure A. Incidence rate ratios (IRR), exposed versus unexposed, for cancers of all types and 95% confidence intervals (CI) by number of CT scans, based on 5 and 10 year lag periods.**

**Web figure B. Incidence rate ratios, exposed versus unexposed, for selected cancers by years since exposure and calendar period of first exposure, based on a 1 year lag period.**

**Web figure C. Absolute excess incidence rates per 100,000 person-years in exposed persons, for selected cancers by years since exposure and calendar period of first exposure, based on a 1 year lag period.**

**Web figure D. Incidence rate ratios (IRR), exposed versus unexposed, and 95% confidence intervals (CI) by site of CT scan and type of cancer, based on a 5 year lag period.**

**Web figure E. Incidence rate ratios (IRR), exposed versus unexposed, for all cancers except brain cancer after brain CT and 95% confidence intervals (CI) based on a 1 year lag period, by number of CT scans**

**Web table A. Number of cancers in exposed persons, incidence rate ratios (IRR) exposed versus unexposed, number of excess cancers in exposed persons, and absolute excess incidence rates (EIR) per 100,000 person-years among exposed persons by type of cancer, based on a 5 year lag period.**

| Cancer type (ICD-10 code) *                                           | Number of cancers in exposed | IRR † (95% CI) ‡           | Number of excess cancers in exposed † | EIR † (95% CI) ‡             |
|-----------------------------------------------------------------------|------------------------------|----------------------------|---------------------------------------|------------------------------|
| Mouth and pharynx (C00-14)                                            | 64                           | 0.97 (0.75 to 1.24)        | -2.3                                  | -0.06 (-0.45 to 0.34)        |
| Digestive organs (C15-26)                                             | 121                          | 1.22 (1.02 to 1.47)        | 21.7                                  | 0.55 (0.00 to 1.09)          |
| Respiratory organs (C30-39)                                           | 36                           | 1.22 (0.87 to 1.71)        | 6.5                                   | 0.16 (-0.13 to 0.46)         |
| Bone (C40-41)                                                         | 48                           | 1.41 (1.05 to 1.90)        | 14.3                                  | 0.36 (0.02 to 0.70)          |
| Melanoma (C43-44)                                                     | 656                          | 1.14 (1.05 to 1.23)        | 80.0                                  | 2.01 (0.75 to 3.28)          |
| Soft tissue (C45-49)                                                  | 69                           | 1.52 (1.19 to 1.94)        | 23.3                                  | 0.59 (0.18 to 1.00)          |
| Breast (C50)                                                          | 142                          | 1.00 (0.85 to 1.18)        | 0.2                                   | 0.00 (-0.58 to 0.59)         |
| Female genital organs (C51-58)                                        | 152                          | 1.24 (1.05 to 1.46)        | 29.8                                  | 0.75 (0.14 to 1.36)          |
| Male genital organs (C60-63)                                          | 230                          | 1.11 (0.97 to 1.27)        | 22.5                                  | 0.57 (-0.18 to 1.31)         |
| Urinary tract (C64-C68)                                               | 38                           | 1.24 (0.89 to 1.73)        | 7.8                                   | 0.20 (-0.11 to 0.50)         |
| Brain (C69-72)                                                        | 162                          | 1.75 (1.49 to 2.06)        | 68.2                                  | 1.72 (1.09 to 2.35)          |
| Brain after brain CT                                                  | 123                          | 2.03 (1.69 to 2.43)        | 61.7                                  | 2.35 (1.52 to 3.18)          |
| Brain after other CT                                                  | 39                           | 1.20 (0.87 to 1.65)        | 6.6                                   | 0.49 (-0.42 to 1.39)         |
| Thyroid (C73-75)                                                      | 212                          | 1.43 (1.24 to 1.65)        | 63.1                                  | 1.59 (0.87 to 2.31)          |
| Ill-defined and unspecified (C76-80)                                  | 18                           | 1.38 (0.85 to 2.23)        | 5.0                                   | 0.13 (-0.08 to 0.34)         |
| <b>All solid cancers (C00-80)</b>                                     | <b>1,948</b>                 | <b>1.21 (1.16 to 1.27)</b> | <b>340.1</b>                          | <b>8.56 (6.38 to 10.74)</b>  |
| Hodgkin lymphoma (C81)                                                | 143                          | 1.08 (0.91 to 1.28)        | 10.2                                  | 0.26 (-0.33 to 0.85)         |
| Other lymphoma (C82-83)                                               | 76                           | 1.03 (0.81 to 1.29)        | 1.7                                   | 0.04 (-0.39 to 0.47)         |
| Other lymphoid tumours (C84-90)                                       | 47                           | 1.67 (1.23 to 2.25)        | 18.9                                  | 0.48 (0.14 to 0.82)          |
| Leukaemias and myelodysplasias (C91-96, D45-46, D47.1, D47.3)         | 151                          | 1.25 (1.06 to 1.47)        | 30.7                                  | 0.77 (0.17 to 1.38)          |
| All leukaemias (C91-96)                                               | 123                          | 1.20 (1.00 to 1.44)        | 20.6                                  | 0.52 (-0.03 to 1.07)         |
| Lymphoid leukaemia (C91)                                              | 49                           | 1.20 (0.90 to 1.60)        | 8.3                                   | 0.21 (-0.14 to 0.55)         |
| Myeloid and other leukaemias (C92-96)                                 | 74                           | 1.19 (0.94 to 1.51)        | 12.4                                  | 0.31 (-0.11 to 0.74)         |
| Myelodysplasias (D45-D46, D47.1, D47.3)                               | 28                           | 1.54 (1.05 to 2.28)        | 10.1                                  | 0.25 (-0.01 to 0.51)         |
| <b>All lymphoid and haematopoietic (C81-96, D45-46, D47.1, D47.3)</b> | <b>417</b>                   | <b>1.17 (1.06 to 1.29)</b> | <b>61.5</b>                           | <b>1.55 (0.54 to 2.56)</b>   |
| <b>All cancers</b>                                                    | <b>2,365</b>                 | <b>1.21 (1.16 to 1.26)</b> | <b>401.6</b>                          | <b>10.11 (7.71 to 12.51)</b> |
| <b>All solid cancers, except brain cancer after brain CT</b>          | <b>1,825</b>                 | <b>1.18 (1.13 to 1.24)</b> | <b>278.4</b>                          | <b>7.01 (4.83 to 9.19)</b>   |
| <b>All cancers, except brain cancer after brain CT</b>                | <b>2,242</b>                 | <b>1.18 (1.13 to 1.23)</b> | <b>339.9</b>                          | <b>8.56 (6.16 to 10.96)</b>  |

\* ICD codes most accurately reflect the cancer types in this and subsequent tables. The names used refer to the commonest cancer types in each rubric. For example, rubric C69-72 refers to eye and other CNS as well as brain; rubric C73-75 refers to thyroid and other endocrine. C97 is not included in this table, as it is not used for cancer incidence registrations.

† Compared with rates in unexposed persons after stratification for age, sex, and year of birth.

‡ 95% confidence interval.

**Web table B. Number of cancers in exposed persons, incidence rate ratios (IRR) exposed versus unexposed, number of excess cancers in exposed persons, and absolute excess incidence rate (EIR) per 100,000 person-years among exposed persons by type of cancer, based on a 10 year lag period.**

| Cancer type (ICD-10 code) *                                           | Number of cancers in exposed | IRR † (95% CI) ‡           | Number of excess cancers in exposed † | EIR † (95% CI) ‡             |
|-----------------------------------------------------------------------|------------------------------|----------------------------|---------------------------------------|------------------------------|
| Mouth and pharynx (C00-14)                                            | 43                           | 1.01 (0.75 to 1.37)        | 0.4                                   | 0.02 (-0.69 to 0.73)         |
| Digestive organs (C15-26)                                             | 79                           | 1.13 (0.90 to 1.42)        | 8.9                                   | 0.49 (-0.47 to 1.46)         |
| Respiratory organs (C30-39)                                           | 23                           | 1.22 (0.80 to 1.86)        | 4.0                                   | 0.22 (-0.30 to 0.74)         |
| Bone (C40-41)                                                         | 20                           | 1.49 (0.95 to 2.34)        | 6.8                                   | 0.38 (-0.11 to 0.86)         |
| Melanoma (C43-44)                                                     | 414                          | 1.19 (1.08 to 1.32)        | 67.0                                  | 3.70 (1.50 to 5.91)          |
| Soft tissue (C45-49)                                                  | 40                           | 1.76 (1.27 to 2.42)        | 17.3                                  | 0.95 (0.27 to 1.64)          |
| Breast (C50)                                                          | 120                          | 0.99 (0.82 to 1.18)        | -1.9                                  | -0.10 (-1.29 to 1.08)        |
| Female genital organs (C51-58)                                        | 100                          | 1.19 (0.97 to 1.46)        | 16.1                                  | 0.89 (-0.19 to 1.97)         |
| Male genital organs (C60-63)                                          | 144                          | 1.19 (1.01 to 1.41)        | 23.0                                  | 1.27 (-0.03 to 2.57)         |
| Urinary tract (C64-C68)                                               | 27                           | 1.23 (0.83 to 1.81)        | 5.1                                   | 0.28 (-0.28 to 0.84)         |
| Brain (C69-72)                                                        | 79                           | 1.54 (1.23 to 1.93)        | 27.5                                  | 1.52 (0.56 to 2.49)          |
| Brain after brain CT                                                  | 61                           | 1.74 (1.35 to 2.25)        | 26.0                                  | 2.06 (0.85 to 3.27)          |
| Brain after other CT                                                  | 18                           | 1.10 (0.69 to 1.75)        | 1.6                                   | 0.28 (-1.24 to 1.80)         |
| Thyroid (C73-75)                                                      | 118                          | 1.28 (1.06 to 1.54)        | 25.8                                  | 1.43 (0.25 to 2.60)          |
| Ill-defined and unspecified (C76-80)                                  | 12                           | 1.45 (0.81 to 2.59)        | 3.7                                   | 0.20 (-0.17 to 0.58)         |
| <b>All solid cancers (C00-80)</b>                                     | <b>1,219</b>                 | <b>1.20 (1.13 to 1.27)</b> | <b>203.7</b>                          | <b>11.26 (7.48 to 15.04)</b> |
| Hodgkin lymphoma (C81)                                                | 59                           | 0.96 (0.74 to 1.25)        | -2.8                                  | -0.16 (-0.99 to 0.68)        |
| Other lymphoma (C82-83)                                               | 36                           | 0.85 (0.61 to 1.19)        | -6.1                                  | -0.34 (-0.99 to 0.31)        |
| Other lymphoid tumours (C84-90)                                       | 25                           | 1.50 (1.00 to 2.25)        | 8.2                                   | 0.45 (-0.09 to 1.00)         |
| Leukaemias and myelodysplasias (C91-96, D45-46, D47.1, D47.3)         | 66                           | 1.09 (0.85 to 1.40)        | 5.8                                   | 0.32 (-0.56 to 1.20)         |
| All leukaemias (C91-96)                                               | 51                           | 1.06 (0.80 to 1.41)        | 3.1                                   | 0.17 (-0.60 to 0.95)         |
| Lymphoid leukaemia (C91)                                              | 10                           | 0.62 (0.33 to 1.16)        | -6.1                                  | -0.34 (-0.68 to 0.00)        |
| Myeloid and other leukaemias (C92-96)                                 | 41                           | 1.29 (0.94 to 1.76)        | 9.3                                   | 0.51 (-0.18 to 1.21)         |
| Myelodysplasias (D45-D46, D47.1, D47.3)                               | 15                           | 1.22 (0.72 to 2.05)        | 2.7                                   | 0.15 (-0.27 to 0.57)         |
| <b>All lymphoid and haematopoietic (C81-96, D45-46, D47.1, D47.3)</b> | <b>186</b>                   | <b>1.03 (0.89 to 1.19)</b> | <b>5.2</b>                            | <b>0.29 (-1.19 to 1.76)</b>  |
| <b>All cancers</b>                                                    | <b>1,405</b>                 | <b>1.18 (1.11 to 1.24)</b> | <b>208.9</b>                          | <b>11.55 (7.49 to 15.61)</b> |
| <b>All solid cancers, except brain cancer after brain CT</b>          | <b>1,158</b>                 | <b>1.18 (1.11 to 1.25)</b> | <b>177.7</b>                          | <b>9.82 (6.04 to 13.61)</b>  |
| <b>All cancers, except brain cancer after brain CT</b>                | <b>1,344</b>                 | <b>1.16 (1.10 to 1.22)</b> | <b>182.9</b>                          | <b>10.11 (6.05 to 14.17)</b> |

\* ICD codes most accurately reflect the cancer types in this and subsequent tables. The names used refer to the commonest cancer types in each rubric. For example, rubric C69-72 refers to eye and other CNS as well as brain; rubric C73-75 refers to thyroid and other endocrine. C97 is not included in this table, as it is not used for cancer incidence registrations.

† Compared with rates in unexposed persons after stratification for age, sex, and year of birth.

‡ 95% confidence interval.

**Web table C. Number of cancers in exposed persons, and incidence rate ratios (IRR) exposed versus unexposed, for selected cancers by year of first CT scan and years since first exposure, based on a 1 year lag period.**

| Cancer type                                                                                                      | Years since first exposure | Year of first CT scan |                     |                     |                     |
|------------------------------------------------------------------------------------------------------------------|----------------------------|-----------------------|---------------------|---------------------|---------------------|
|                                                                                                                  |                            | 1985-89               | 1990-94             | 1995-99             | 2000-05             |
| Brain cancer after brain CT                                                                                      | 1-4 years                  | 32*                   | 19                  | 19                  | 17                  |
|                                                                                                                  |                            | 5.58 (3.95 to 7.89) † | 2.95 (1.88 to 4.62) | 2.68 (1.71 to 4.20) | 2.22 (1.38 to 3.57) |
|                                                                                                                  | 5-9 years                  | 34                    | 12                  | 15                  | 1                   |
|                                                                                                                  |                            | 4.60 (3.29 to 6.44)   | 1.44 (0.82 to 2.54) | 1.76 (1.06 to 2.91) | 0.61 (0.09 to 4.35) |
|                                                                                                                  | 10-14 years                | 14                    | 19                  | 3                   | -                   |
|                                                                                                                  |                            | 1.58 (0.93 to 2.67)   | 2.00 (1.28 to 3.14) | 1.74 (0.56 to 5.40) | -                   |
| 15+ years                                                                                                        | 21                         | 4                     | -                   | -                   |                     |
|                                                                                                                  | 1.70 (1.11 to 2.60)        | 2.01 (0.75 to 5.35)   | -                   | -                   |                     |
| All years since first exposure                                                                                   | 101                        | 54                    | 37                  | 18                  |                     |
|                                                                                                                  | 2.94 (2.42 to 3.57)        | 2.06 (1.58 to 2.69)   | 2.13 (1.54 to 2.94) | 1.94 (1.22 to 3.07) |                     |
| <i>2p for trend in IRR with year of first CT scan after accounting for years since first exposure: &lt;0.001</i> |                            |                       |                     |                     |                     |
| All solid cancers, except brain cancer after brain CT                                                            | 1-4 years                  | 68                    | 101                 | 146                 | 157                 |
|                                                                                                                  |                            | 1.31 (1.04 to 1.67)   | 1.21 (1.00 to 1.48) | 1.30 (1.11 to 1.53) | 1.24 (1.06 to 1.46) |
|                                                                                                                  | 5-9 years                  | 144                   | 229                 | 239                 | 55                  |
|                                                                                                                  |                            | 1.16 (0.99 to 1.37)   | 1.27 (1.11 to 1.44) | 1.09 (0.96 to 1.24) | 1.29 (0.99 to 1.68) |
|                                                                                                                  | 10-14 years                | 245                   | 308                 | 68                  | -                   |
|                                                                                                                  |                            | 1.16 (1.02 to 1.32)   | 1.11 (1.00 to 1.25) | 1.17 (0.92 to 1.48) | -                   |
| 15+ years                                                                                                        | 452                        | 85                    | -                   | -                   |                     |
|                                                                                                                  | 1.24 (1.13 to 1.37)        | 1.25 (1.01 to 1.54)   | -                   | -                   |                     |
| All years since first exposure                                                                                   | 909                        | 723                   | 453                 | 212                 |                     |
|                                                                                                                  | 1.21 (1.14 to 1.29)        | 1.19 (1.10 to 1.28)   | 1.16 (1.06 to 1.27) | 1.26 (1.10 to 1.44) |                     |
| <i>2p for trend in IRR with year of first CT scan after accounting for years since first exposure: 0.68</i>      |                            |                       |                     |                     |                     |
| Leukaemias and myelodysplasias                                                                                   | 1-4 years                  | 13                    | 16                  | 35                  | 31                  |
|                                                                                                                  |                            | 1.14 (0.66 to 1.96)   | 0.97 (0.59 to 1.58) | 1.52 (1.09 to 2.12) | 1.12 (0.79 to 1.59) |
|                                                                                                                  | 5-9 years                  | 10                    | 34                  | 33                  | 8                   |
|                                                                                                                  |                            | 0.82 (0.44 to 1.52)   | 1.83 (1.31 to 2.56) | 1.38 (0.98 to 1.94) | 1.40 (0.70 to 2.79) |
|                                                                                                                  | 10-14 years                | 12                    | 20                  | 7                   | -                   |
|                                                                                                                  |                            | 0.87 (0.49 to 1.53)   | 1.10 (0.71 to 1.71) | 1.57 (0.75 to 3.29) | -                   |
| 15+ years                                                                                                        | 24                         | 3                     | -                   | -                   |                     |
|                                                                                                                  | 1.28 (0.86 to 1.91)        | 0.77 (0.25 to 2.39)   | -                   | -                   |                     |
| All years since first exposure                                                                                   | 59                         | 73                    | 75                  | 39                  |                     |
|                                                                                                                  | 1.05 (0.81 to 1.35)        | 1.28 (1.02 to 1.61)   | 1.46 (1.16 to 1.83) | 1.17 (0.85 to 1.60) |                     |
| <i>2p for trend in IRR with year of first CT scan after accounting for years since first exposure: 0.33</i>      |                            |                       |                     |                     |                     |
| Other lymphoid and haematopoietic cancers                                                                        | 1-4 years                  | 16                    | 29                  | 33                  | 53                  |
|                                                                                                                  |                            | 1.27 (0.78 to 2.07)   | 1.41 (0.98 to 2.03) | 1.07 (0.76 to 1.50) | 1.29 (0.99 to 1.69) |
|                                                                                                                  | 5-9 years                  | 21                    | 48                  | 58                  | 19                  |
|                                                                                                                  |                            | 0.96 (0.63 to 1.47)   | 1.41 (1.06 to 1.87) | 1.21 (0.94 to 1.57) | 1.72 (1.10 to 2.70) |
|                                                                                                                  | 10-14 years                | 26                    | 39                  | 11                  | -                   |
|                                                                                                                  |                            | 0.94 (0.64 to 1.38)   | 0.99 (0.72 to 1.36) | 1.17 (0.65 to 2.10) | -                   |
| 15+ years                                                                                                        | 35                         | 9                     | -                   | -                   |                     |
|                                                                                                                  | 0.97 (0.70 to 1.36)        | 1.24 (0.64 to 2.38)   | -                   | -                   |                     |
| All years since first exposure                                                                                   | 98                         | 125                   | 102                 | 72                  |                     |
|                                                                                                                  | 1.00 (0.82 to 1.22)        | 1.23 (1.04 to 1.47)   | 1.16 (0.95 to 1.41) | 1.38 (1.10 to 1.74) |                     |
| <i>2p for trend in IRR with year of first CT scan after accounting for years since first exposure: 0.31</i>      |                            |                       |                     |                     |                     |

**Web table C. (continued)**

|                                                                                                             |                     |                     |                     |                     |                     |
|-------------------------------------------------------------------------------------------------------------|---------------------|---------------------|---------------------|---------------------|---------------------|
| All cancers, except<br>brain cancer after<br>brain CT                                                       | 1-4 years           | 97                  | 146                 | 214                 | 241                 |
|                                                                                                             |                     | 1.28 (1.05 to 1.56) | 1.21 (1.03 to 1.43) | 1.29 (1.13 to 1.47) | 1.24 (1.09 to 1.40) |
|                                                                                                             | 5-9 years           | 175                 | 311                 | 330                 | 82                  |
|                                                                                                             |                     | 1.11 (0.96 to 1.29) | 1.33 (1.19 to 1.49) | 1.13 (1.02 to 1.26) | 1.38 (1.11 to 1.72) |
|                                                                                                             | 10-14 years         | 283                 | 367                 | 86                  | -                   |
|                                                                                                             | 1.12 (1.00 to 1.26) | 1.10 (0.99 to 1.22) | 1.19 (0.96 to 1.47) | -                   |                     |
| 15+ years                                                                                                   | 511                 | 97                  | -                   | -                   |                     |
|                                                                                                             | 1.22 (1.12 to 1.33) | 1.22 (1.00 to 1.49) | -                   | -                   |                     |
| All years since first<br>exposure                                                                           | 1066                | 921                 | 630                 | 323                 |                     |
|                                                                                                             | 1.18 (1.11 to 1.25) | 1.20 (1.13 to 1.28) | 1.19 (1.10 to 1.29) | 1.27 (1.14 to 1.42) |                     |
| <i>2p for trend in IRR with year of first CT scan after accounting for years since first exposure: 0.71</i> |                     |                     |                     |                     |                     |
| All Cancers                                                                                                 | 1-4 years           | 129                 | 165                 | 233                 | 258                 |
|                                                                                                             |                     | 1.58 (1.33 to 1.88) | 1.30 (1.12 to 1.52) | 1.35 (1.18 to 1.53) | 1.27 (1.13 to 1.44) |
|                                                                                                             | 5-9 years           | 209                 | 323                 | 345                 | 83                  |
|                                                                                                             |                     | 1.26 (1.10 to 1.45) | 1.34 (1.20 to 1.49) | 1.15 (1.04 to 1.28) | 1.36 (1.10 to 1.69) |
|                                                                                                             | 10-14 years         | 297                 | 386                 | 89                  | -                   |
|                                                                                                             | 1.14 (1.01 to 1.27) | 1.12 (1.02 to 1.24) | 1.20 (0.98 to 1.48) | -                   |                     |
| 15+ years                                                                                                   | 532                 | 101                 | -                   | -                   |                     |
|                                                                                                             | 1.24 (1.14 to 1.35) | 1.24 (1.02 to 1.51) | -                   | -                   |                     |
| All years since first<br>exposure                                                                           | 1167                | 975                 | 667                 | 341                 |                     |
|                                                                                                             | 1.24 (1.17 to 1.32) | 1.23 (1.15 to 1.31) | 1.22 (1.13 to 1.32) | 1.29 (1.16 to 1.44) |                     |
| <i>2p for trend in IRR with year of first CT scan after accounting for years since first exposure: 0.18</i> |                     |                     |                     |                     |                     |

\* Observed number of cancers in exposed persons.

† Incidence rate ratio (IRR) exposed versus unexposed calculated after stratification for age, sex, and year of birth (95% confidence interval).

**Web table D. Number of cancers in exposed persons, incidence rate ratios (IRR) exposed versus unexposed, number of excess cancers in exposed persons, and absolute excess incidence rates (EIR) per 100,000 person-years by type of cancer and sex, based on a 1 year lag period.**

| Type of cancer                        | Number of cancers and IRR                            |                              | 2p for difference | Number of excess cancers and EIR                      |                               | 2p for difference |
|---------------------------------------|------------------------------------------------------|------------------------------|-------------------|-------------------------------------------------------|-------------------------------|-------------------|
|                                       | Females                                              | Males                        |                   | Females                                               | Males                         |                   |
| Brain cancer                          | 124 <sup>*</sup><br>2.15 (1.78 to 2.59) <sup>†</sup> | 159<br>2.11 (1.78 to 2.49)   | 0.99              | 64.6 <sup>‡</sup><br>2.09 (1.38 to 2.79) <sup>§</sup> | 82.8<br>2.44 (1.71 to 3.17)   | 0.49              |
| after brain CT                        | 103<br>2.70 (2.21 to 3.31)                           | 107<br>2.23 (1.83 to 2.71)   |                   | 64.1<br>3.21 (2.21 to 4.20)                           | 58.6<br>2.74 (1.80 to 3.69)   |                   |
| after other CT                        | 21<br>1.02 (0.66 to 1.58)                            | 52<br>1.87 (1.41 to 2.48)    | 0.02              | 0.5<br>0.04 (-0.80 to 0.86)                           | 24.1<br>1.93 (0.80 to 3.00)   | 0.003             |
| All solid cancers except brain cancer | 1,247<br>1.23 (1.16 to 1.31)                         | 977<br>1.14 (1.07 to 1.22)   | 0.07              | 234.8<br>7.59 (5.35 to 9.82)                          | 121.0<br>3.57 (1.76 to 5.37)  | 0.006             |
| Leukaemias and myelodysplasias        | 94<br>1.15 (0.93 to 1.42)                            | 152<br>1.29 (1.09 to 1.52)   | 0.33              | 12.2<br>0.39 (-0.22 to 1.01)                          | 35.6<br>1.05 (0.34 to 1.76)   | 0.17              |
| Other lymphoid and haematopoietic     | 171<br>1.17 (1.00 to 1.37)                           | 226<br>1.17 (1.02 to 1.34)   | 0.96              | 25.2<br>0.81 (-0.01 to 1.64)                          | 32.2<br>0.95 (0.08 to 1.82)   | 0.82              |
| All cancers                           | 1,636<br>1.26 (1.20 to 1.33)                         | 1,514<br>1.22 (1.16 to 1.29) | 0.36              | 336.8<br>10.88 (8.32 to 13.44)                        | 271.6<br>8.01 (5.76 to 10.26) | 0.10              |

<sup>\*</sup> Observed number of cancers in exposed persons.

<sup>†</sup> Incidence rate ratio (IRR) exposed versus unexposed (95% confidence interval).

<sup>‡</sup> Excess number of cancers in exposed compared with unexposed.

<sup>§</sup> Excess incidence rate per 100,000 person-years in exposed (95% confidence interval).

Incidence rate ratios, excess numbers of cancers, and excess incidence rates calculated after stratification for age, sex, and year of birth

**Web table E. Number of cancers in exposed persons, incidence rate ratios (IRR) exposed versus unexposed, number of excess cancers in exposed persons, and excess incidence rates (EIR) per 100,000 person-years by type of cancer and socioeconomic status (SES), based on a 1 year lag period.**

| Type of cancer                            | Number of cancers and IRR                           |                              |                            | 2p for trend | Number of excess cancers and EIR                      |                               |                                | 2p for trend |
|-------------------------------------------|-----------------------------------------------------|------------------------------|----------------------------|--------------|-------------------------------------------------------|-------------------------------|--------------------------------|--------------|
|                                           | Pooled SES categories                               |                              |                            |              | Pooled SES categories                                 |                               |                                |              |
|                                           | 1, 2                                                | 3, 4, 5                      | 6, 7                       |              | 1, 2                                                  | 3, 4, 5                       | 6, 7                           |              |
| Brain cancer                              | 71 <sup>*</sup><br>2.17 (1.69 to 2.78) <sup>†</sup> | 128<br>2.15 (1.79 to 2.59)   | 84<br>2.05 (1.63 to 2.57)  | 0.65         | 37.9 <sup>‡</sup><br>2.24 (1.27 to 3.22) <sup>§</sup> | 67.4<br>2.36 (1.58 to 3.13)   | 41.9<br>2.16 (1.23 to 3.09)    | 0.90         |
| after brain CT                            | 51<br>2.31 (1.73 to 3.07)                           | 93<br>2.37 (1.92 to 2.94)    | 66<br>2.63 (2.04 to 3.38)  | 0.49         | 28.7<br>2.55 (1.31 to 3.80)                           | 53.3<br>2.88 (1.86 to 3.90)   | 40.4<br>3.49 (2.12 to 4.87)    | 0.32         |
| after other CT                            | 20<br>1.85 (1.18 to 2.89)                           | 35<br>1.68 (1.19 to 2.35)    | 18<br>1.09 (0.68 to 1.75)  | 0.10         | 9.2<br>1.63 (0.70 to 3.18)                            | 14.0<br>1.39 (0.24 to 2.54)   | 1.5<br>0.19 (-0.90 to 1.25)    | 0.08         |
| All solid cancers except brain cancer     | 593<br>1.22 (1.13 to 1.33)                          | 960<br>1.15 (1.08 to 1.23)   | 671<br>1.25 (1.15 to 1.35) | 0.68         | 108.6<br>6.43 (3.60 to 9.26)                          | 123.5<br>4.32 (2.20 to 6.44)  | 133.5<br>6.88 (4.27 to 9.50)   | 0.76         |
| Leukaemias and myelodysplasias            | 78<br>1.46 (1.15 to 1.84)                           | 93<br>1.04 (0.84 to 1.29)    | 75<br>1.35 (1.06 to 1.71)  | 0.59         | 24.8<br>1.47 (0.45 to 2.50)                           | 4.6<br>0.16 (-0.50 to 0.82)   | 19.2<br>0.99 (0.11 to 1.86)    | 0.65         |
| Other lymphoid and haematopoietic cancers | 105<br>1.28 (1.05 to 1.57)                          | 169<br>1.16 (0.99 to 1.36)   | 123<br>1.11 (0.92 to 1.33) | 0.26         | 23.2<br>1.38 (0.19 to 2.57)                           | 23.0<br>0.80 (-0.09 to 1.70)  | 11.5<br>0.59 (-0.53 to 1.71)   | 0.35         |
| All cancers                               | 847<br>1.30 (1.21 to 1.39)                          | 1,350<br>1.20 (1.13 to 1.26) | 953<br>1.28 (1.20 to 1.37) | 0.78         | 194.5<br>11.52 (8.14 to 14.90)                        | 218.4<br>7.64 (5.12 to 10.16) | 206.1<br>10.62 (7.50 to 13.74) | 0.78         |

\* Observed number of cancers in exposed persons.

† Incidence rate ratio (IRR) exposed versus unexposed (95% confidence interval).

‡ Excess number of cancers in exposed persons compared with unexposed persons.

§ Excess incidence rate per 100,000 person-years in exposed persons (95% confidence interval).

Incidence rate ratios, excess numbers of cancers, and excess incidence rates calculated after stratification for age, sex, and year of birth.

The few individuals with unknown SES (see Table 1) are excluded from the Table.

**Web figure A. Incidence rate ratios (IRR), exposed versus unexposed, for cancers of all types and 95% confidence intervals(CI) by number of CT scans, based on 5 and 10 year lag periods.**

**a) 5 year lag**

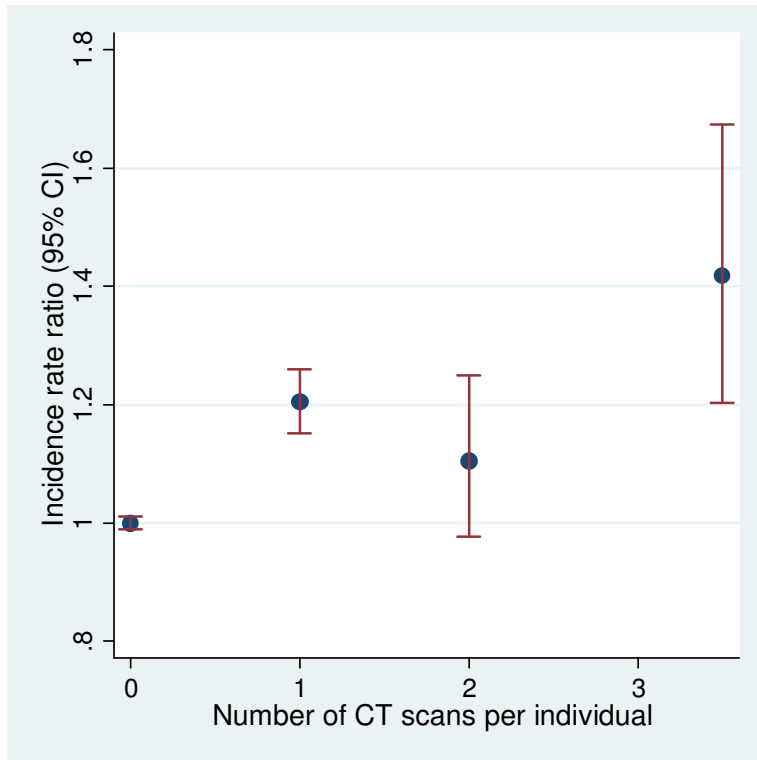

**b) 10 year lag**

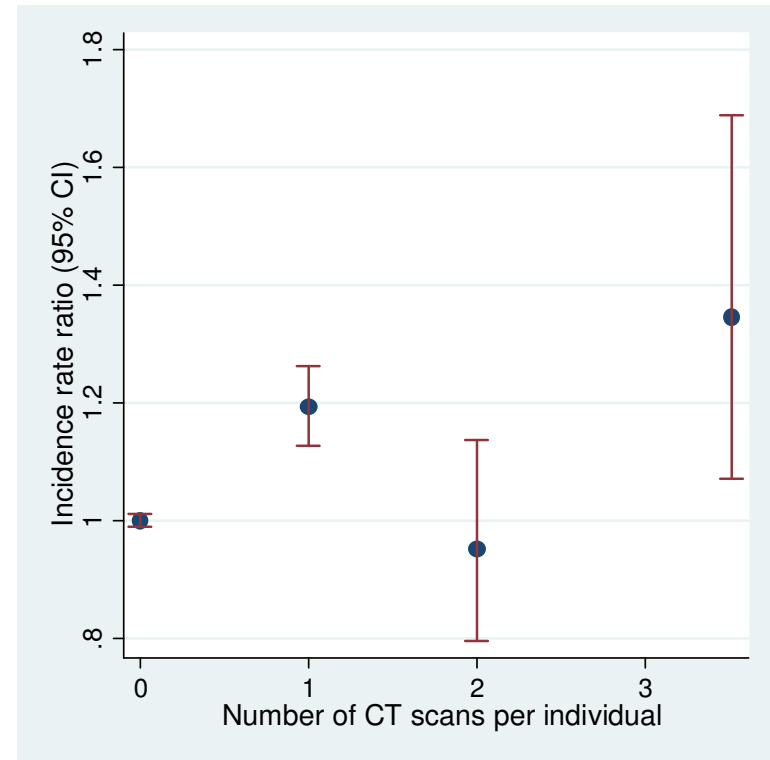

Based on a 5 year lag, the incidence rate increased by 0.13 (95% CI 0.10 to 0.16) for each additional CT scan, calculated after stratification for age, sex, and year of birth ( $\chi^2$  for trend: 65.3, 2p <0.0001). If unexposed persons are excluded, the trend is no longer significant ( $\chi^2$  for trend: 0.26, 2p = 0.62).

Based on a 10 year lag, the incidence rate increased by an average factor of 0.10 (95% CI 0.06 to 0.15) for every additional CT scan calculated after stratification for age, sex, and year of birth ( $\chi^2$  for trend: 24.7, p<0.0001). If unexposed persons are excluded, the trend is no longer significant ( $\chi^2$  for trend: 0.46, 2p = 0.50).

For both 5 and 10 year lags, the average number of scans among individuals exposed to 3+ scans was 3.5.



Web figure B. Incidence rate ratios, exposed versus unexposed, for selected cancers by years since exposure and calendar period of first exposure, based on a 1 year lag period.

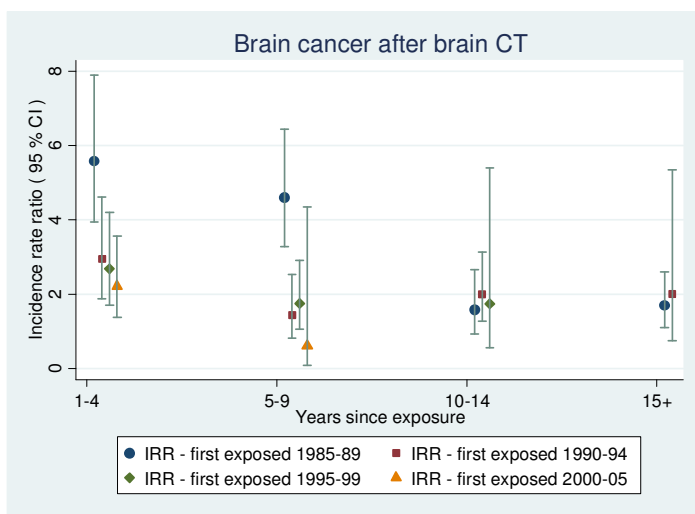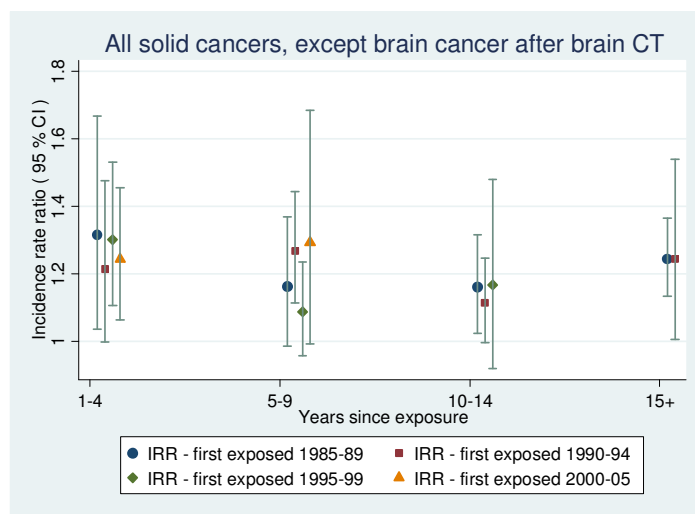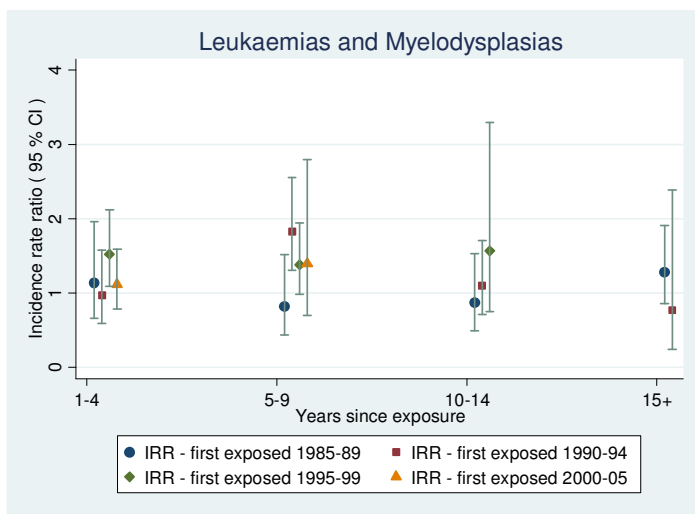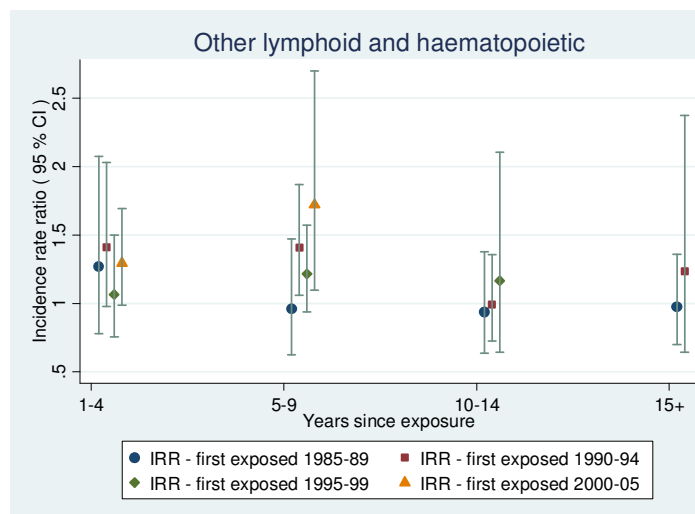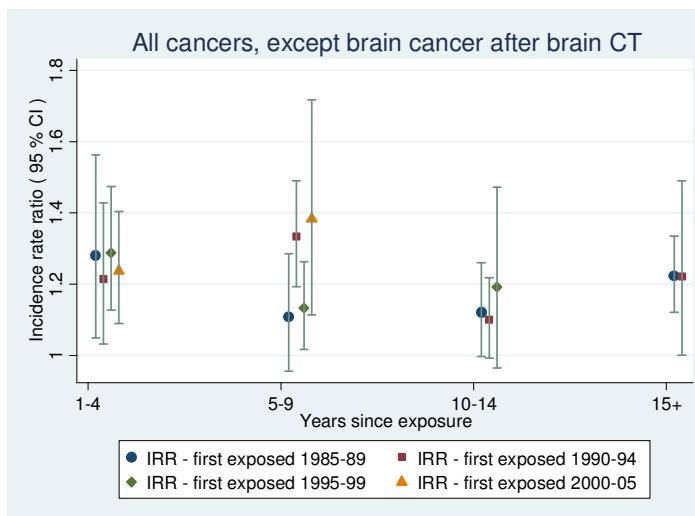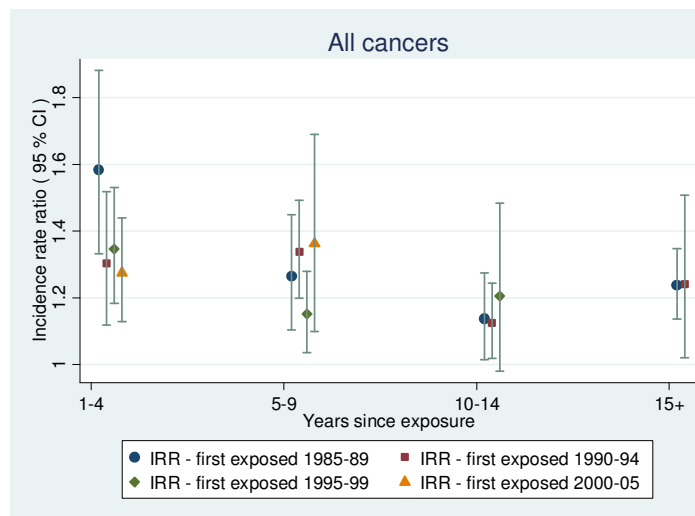

Incidence rate ratios, exposed versus unexposed, calculated after stratification for age, sex, and year of birth

**Web figure C. Absolute excess incidence rates per 100,000 person-years in exposed persons, for selected cancers by years since exposure and calendar period of first exposure, based on a 1 year lag period.**

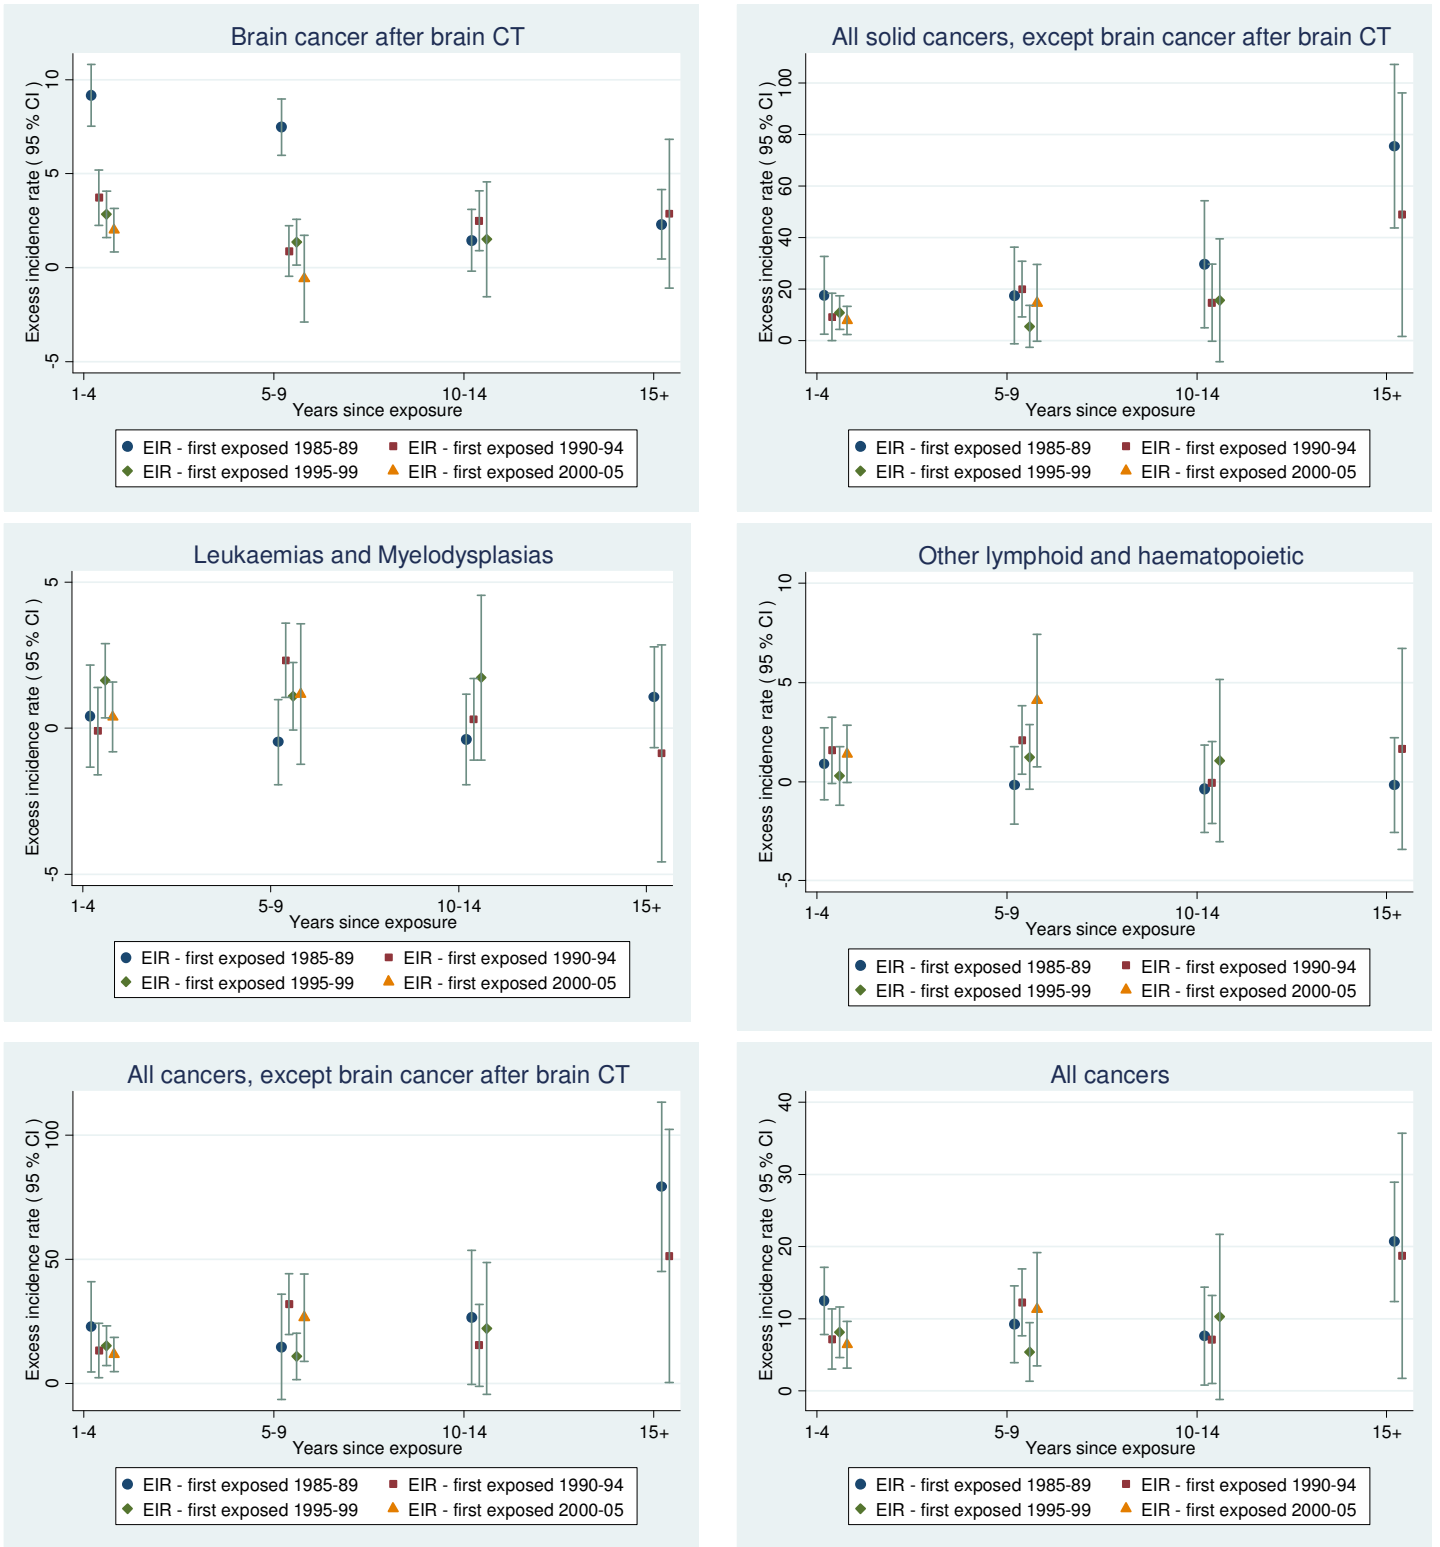

Absolute excess incidence rates compared with rates in unexposed persons, after stratification for age, sex, and year of birth.

**Web figure D. Incidence rate ratios (IRR), exposed versus unexposed, and 95% confidence intervals (CI) by site of CT scan and type of cancer, based on a 5 year lag period.**

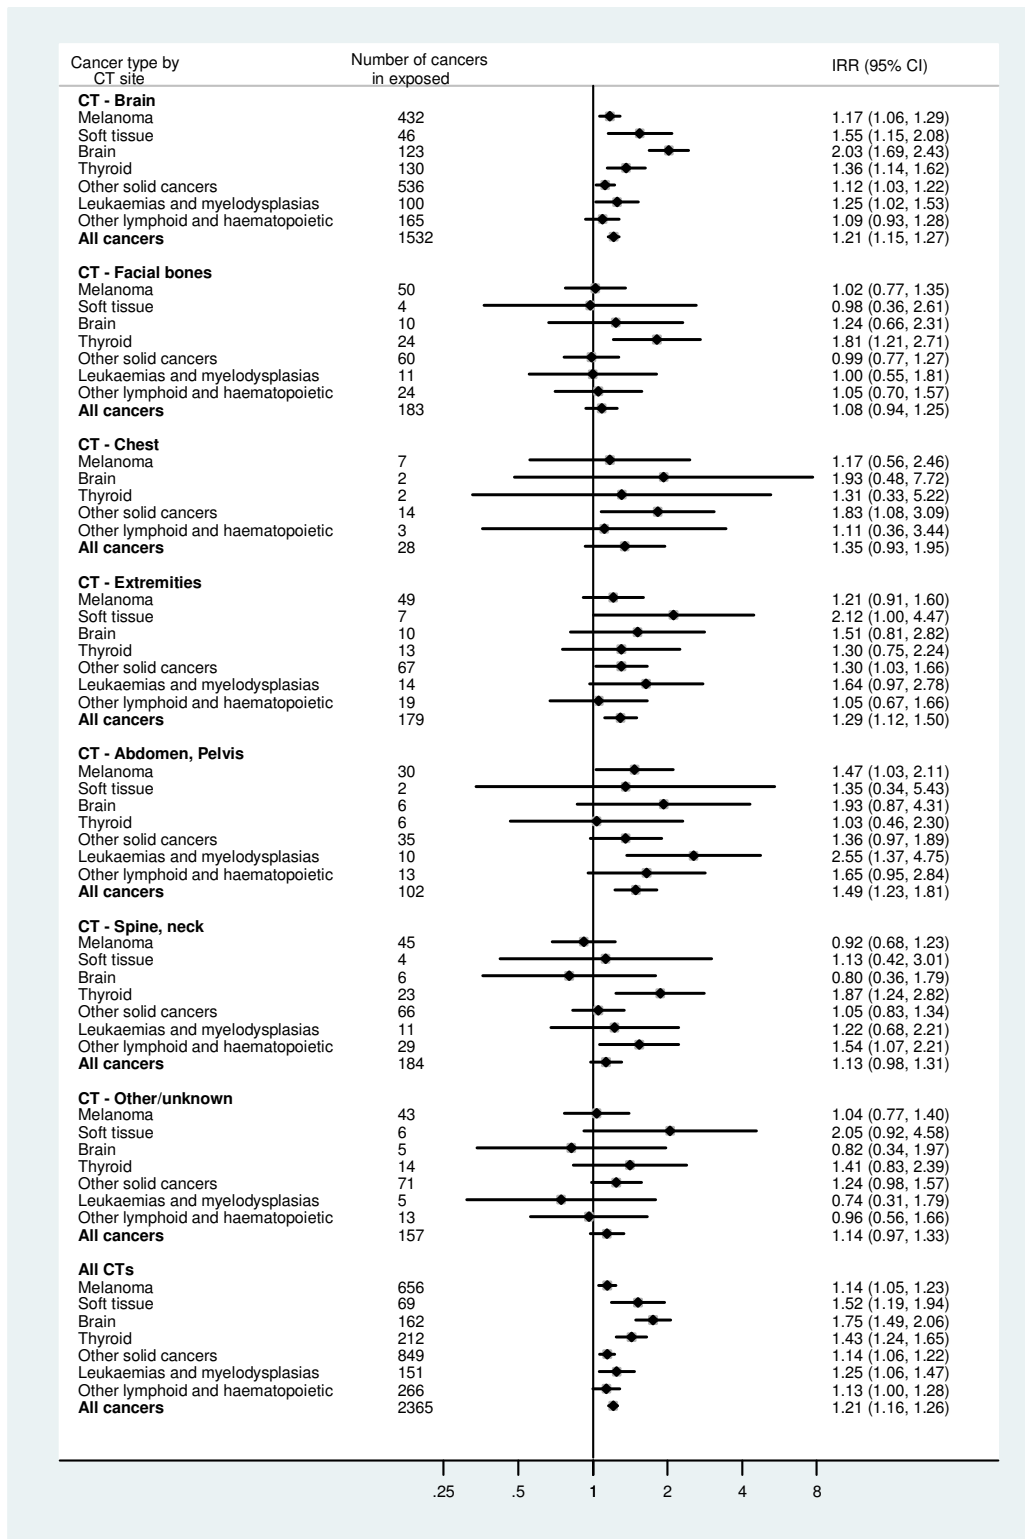

Incidence rate ratios versus unexposed calculated after stratification for age, sex, and year of birth. Heterogeneity between cancer types — all sites of CT scan exposure:  $\chi^2 = 33.5$  on 6 df,  $p < 0.001$ ; brain scans:  $\chi^2 = 36.5$  on 6 df,  $p < 0.001$ . Heterogeneity between sites of CT scan exposure — all cancers:  $\chi^2 = 9.04$  on 6 df,  $p = 0.156$ ; brain cancer:  $\chi^2 = 12.48$  on 6 df,  $p = 0.052$ ; leukaemias:  $\chi^2 = 7.24$  on 5 df,  $p = 0.211$ .

**Web figure E. Incidence rate ratios (IRR), exposed versus unexposed, for all cancers except brain cancer after brain CT and 95% confidence intervals (CI) based on a 1 year lag period, by number of CT scans.**

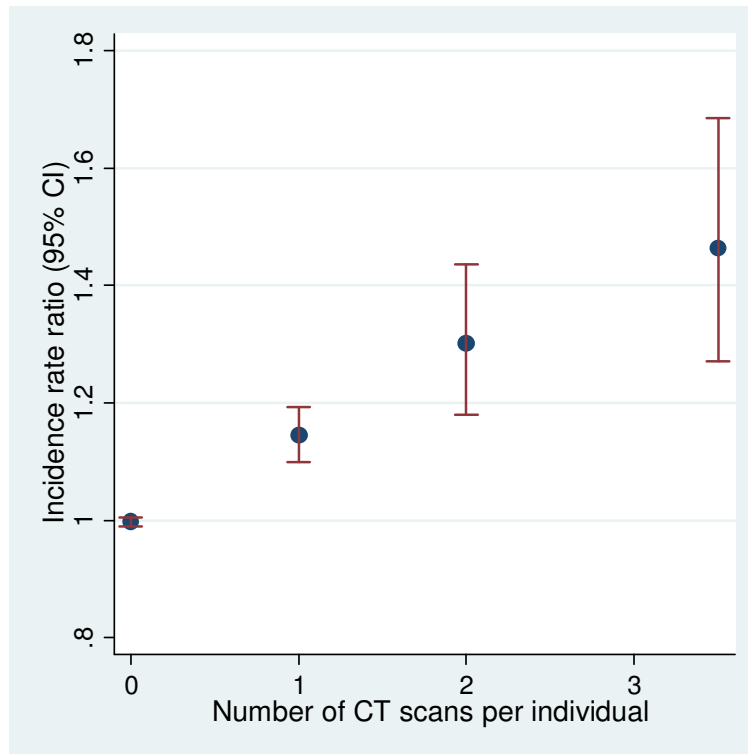

The incidence rate ratio increased by 0.14 (95% CI 0.11 to 0.17) for each additional CT scan, calculated after stratification for age, sex, and year of birth ( $\chi^2$  for trend: 94.7,  $p < 0.0001$ ). If unexposed persons are excluded the trend remains significant ( $\chi^2$  for trend: 7.90  $p = 0.005$ ).

The average number of scans among individuals exposed to 3+ scans was 3.5.
